# Supplementary material for: Role Refinement in Access Control: Model and Analysis
Source: Atypon-hosted journal article supplement (doi:10.1287/ijoc.2014.0603), 2014-07-28
Supplement: ijoc.2014.0603-sm-onlineappendix.pdf [file ijoc.2014.0603-sm-onlineappendix.pdf]

## Online Appendix for “Role Refinement in Access Control: Model and Analysis”

Hao Xia, Milind Dawande, Vijay Mookerjee

Naveen Jindal School of Management, The University of Texas at Dallas, Richardson, Texas 75080

hao.xia@student.utdallas.edu, milind@utdallas.edu, vijaym@utdallas.edu

### Proofs of Technical Results

LEMMA 1. *If a feasible solution exists for RRP, then Algorithm GREEDY generates one such solution in a finite number of iterations.*

**Proof of Lemma 1.** Initially, each existing role  $R_i \in \mathcal{R}$  is exactly the union of some subset of its neighbors (i.e., sets  $C_j \in \mathcal{C}$  such that edge  $e(R_i, C_j)$  exists) in the bipartite graph  $B$ . Otherwise, clearly no feasible solution exists. In each subsequent iteration, only the permissions covered by the chosen candidate  $C$  are removed from each set  $R \in \mathcal{R}$ . Thus, in any iteration, an updated set  $R_i$  is always a subset of the union of its neighbors in  $B$ . Consequently, as long as there exists a  $R_i \neq \emptyset$  in  $\mathcal{R}$ , we are guaranteed to find at least one candidate  $C_j$  such that  $w_{ij} \geq 1$  and, thus,  $w_j \geq 1$ . This, in turn, guarantees that the greedy algorithm can pick one candidate and remove at least one permission from one of the roles in  $\mathcal{R}$  in each iteration, until the updated system  $\mathcal{R} = \emptyset$ . The number of iterations required is finite, since both the number of roles and the number of permissions in each role are finite. ■

THEOREM 1. *Algorithm GREEDY is a  $O(\ln M)$ -factor, polynomial-time algorithm for RRP.*

**Proof of Theorem 1.** Consider Iteration  $t$ , when candidate  $C_j$  is picked. The remaining  $M(t)$  permissions in (the updated system)  $\mathcal{R}$  can always be fully covered by the optimal solution  $OPT$ . Therefore, the cost to cover these  $M(t)$  permissions is at most  $OPT^c$ . The chosen candidate  $C_j$  has the lowest cost per unit coverage  $c(C_j)/w_j$  over all the sets in  $\mathcal{C}$ . Thus,

$$\frac{c(C_j)}{w_j} \leq \frac{OPT^c}{M(t)}$$

Note that the price of each of the  $w_j$  permissions covered in Iteration  $t$  is  $c(C_j)/w_j$ . In our assumed ordering (defined above), let  $e_\ell$  be the first permission to be covered in Iteration  $t$ . Then, the number of permissions remaining (to be covered) at the beginning of Iteration  $t$  is at least  $M - \ell + 1$ . That is,  $M(t) \geq M - \ell + 1$ . Since  $p_\ell = c(C_j)/w_j$ , it follows that

$$p_\ell \leq \frac{OPT^c}{M - \ell + 1}$$

Summing up the prices of all the  $M$  permissions, we obtain a bound on the cost  $GRD^c$  of Algorithm GREEDY:

$$GRD^c = \sum_{i=1}^M p_i \leq \left(1 + \frac{1}{2} + \frac{1}{3} + \dots + \frac{1}{M}\right) OPT^c \leq (1 + \ln M) OPT^c$$

To see that Algorithm GREEDY is a polynomial-time procedure, we recall that  $|\mathcal{C}| = n$  and  $|\mathcal{R}| = k$ . The number of iterations is clearly no more than  $n$ , since each iteration picks one candidate from the set  $\mathcal{C}$ . Let  $u = \max_{1 \leq j \leq n; 1 \leq i \leq k} (|C_j| |R_i|)$ . The time complexity of checking whether  $C_j \subseteq R_i$  in the initial construction of the bipartite graph  $B(\mathcal{R}, \mathcal{C}, \mathbf{E})$  is  $O(u)$ . Thus, the time complexity of building the initial graph  $B$  is  $O(nku)$ .

Similarly, the time required for updating the graph in each iteration is also  $O(nku)$ . Thus, the algorithm runs in time  $O(n^2ku)$ , which is polynomial in the size of the input. ■

**THEOREM 2.** *Algorithm RANDOMIZED ROUNDING is a polynomial-time algorithm for RRP which achieves the following two properties: (i) its output  $\mathcal{S} = \cup_{\theta=1}^{\lceil 2 \ln M \rceil} \bar{\mathcal{S}}_{\theta}$  is a feasible solution to RRP with high probability for sufficiently large  $M$ . In particular, the probability that  $\mathcal{S}$  is feasible approaches 1 as  $M \rightarrow \infty$ , (ii) the expected cost of  $\mathcal{S}$  is  $O(\ln M)$  times the cost of the optimal solution.*

**Proof of Theorem 2.** The output of Algorithm RANDOMIZED ROUNDING is the union of  $\lceil 2 \ln M \rceil$  potential solutions to RRP  $\bar{\mathcal{S}}_{\theta}, \theta = 1, 2, \dots, \lceil 2 \ln M \rceil$ . The probability that any specific permission, say  $e_{\ell}$ , is not covered by any one potential solution to RRP is no more than  $1/e$ . Therefore,

$$\mathbf{Prob}[e_{\ell} \text{ is not covered by } \mathcal{S}] \leq \left(\frac{1}{e}\right)^{\lceil 2 \ln M \rceil} \leq \frac{1}{M^2}$$

$\mathcal{S}$  is a feasible solution to RRP if it covers all  $e_{\ell}, \ell = 1, 2, \dots, M$ . Thus,

$$\mathbf{Prob}[\mathcal{S} \text{ is a feasible solution to RRP}] \geq 1 - M \frac{1}{M^2} = 1 - \frac{1}{M}$$

Consequently, as  $M \rightarrow \infty$ , the probability that  $\mathcal{S}$  is feasible for RRP tends to 1. Furthermore,  $\mathbf{E}[\text{cost}(\mathcal{S})] \leq \mathbf{E}[\lceil 2 \ln M \rceil \cdot \text{cost}(\bar{\mathcal{S}})] \leq \lceil 2 \ln M \rceil \cdot OPT^c$ .

It is easy to see that Algorithm RANDOMIZED ROUNDING is a polynomial-time procedure. The time required to obtain the LP formulation and the time to solve it are both polynomial in the size of the input, with the latter being a well-known result in the literature; see, e.g., Martin (1999), Nemhauser and Wolsey (1988). The cardinality of each potential solution is at most  $n$  and, hence, the time required to generate  $\lceil 2 \ln M \rceil$  of them and compute their union is  $O(n \ln M)$ , which is also polynomial in the input size. ■
